# Supplementary material
Source: publisher figshare collection journal article supplement (https://gsajournals.figshare.com/articles/dataset/_/10006487)
Supplement: Supplementary file 1 [file 1]

## Sheet: Sheet1
Colony	Arrangement	Read Pairs	Read Coverage	Proportion Mapping > 1Kb	Mean Clone Coverage
Ndokayo	#ERROR!	8006299	4.31X	0.368	19378.9
Pimperena	2Rb/2Rb	7463895	4.01X	0.334	16159.9
Mali-NIH	2La/2La; 2Rbc/2Rbc	1945753	1.12X	0.235	4511
Banfora M	2Rd/2Rd	19098259	12.25X	0.31	61008.6
Banfora M	2Rd/2R+d	24965090	15.68X	0.307	86678.9
